# Supplementary material for: Development of an in-vitro high-throughput screening system to identify modulators of genitalia development
Source: PubMed Central journal article supplement (PMC9832959; doi:10.1093/pnasnexus/pgac300), 2022-12-28
Supplement: pgac300_supplemental_file.pdf [file pgac300_supplemental_file.pdf]

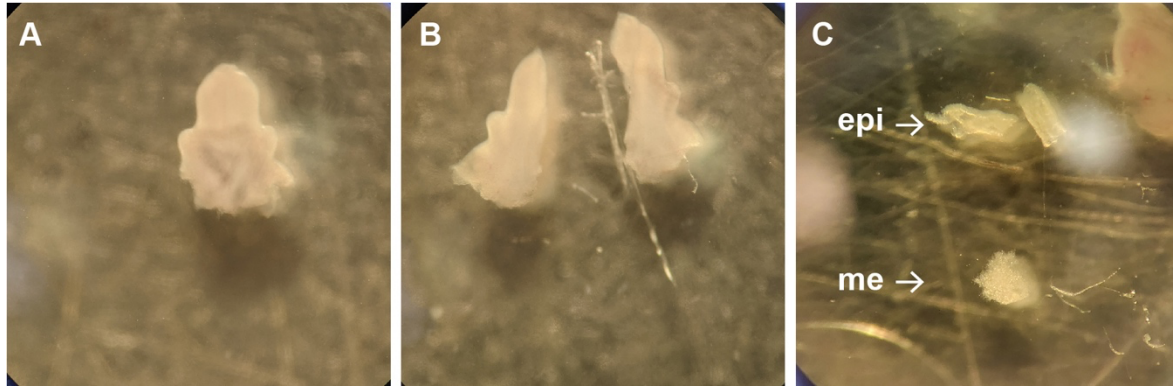

Figure S1. Gross morphology of E16.5 GT right after dissection (A), after being bisected (B), and after the initial trypsin digestion (C). Chunks of mesenchymal tissues (me) were further digested in collagenase/trypsin after being separated from epithelial sheets (epi).

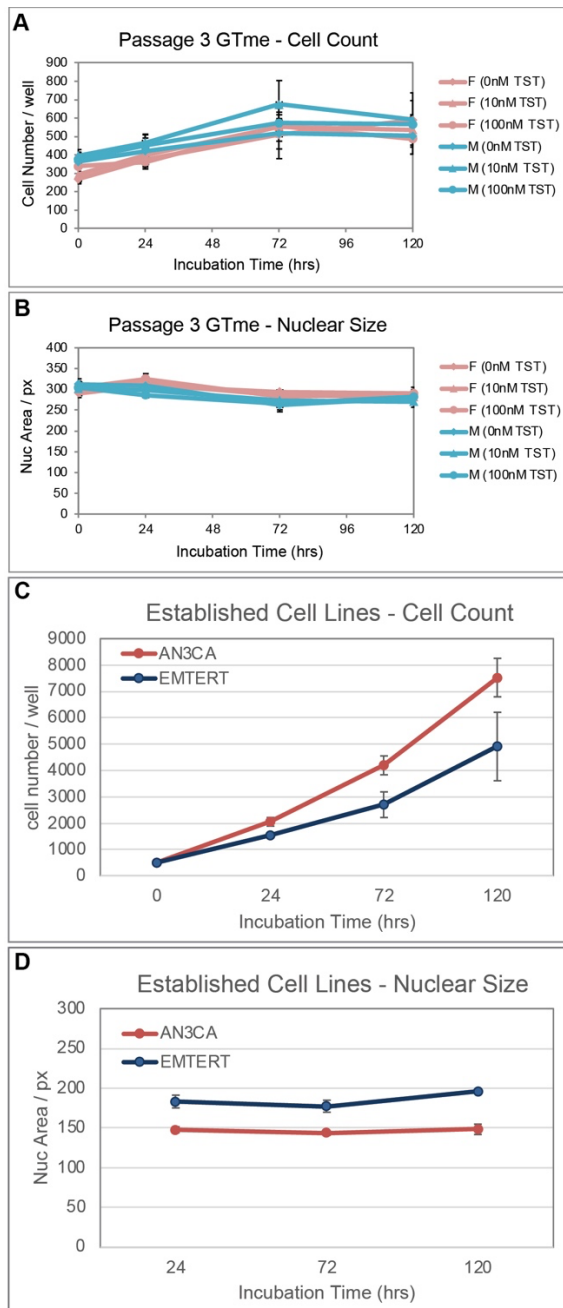

Figure S2. GTme cells lose growth capacity over time. Growth curves (A) and measured nuclear size over time (B) of passage three GTme cells with or without testosterone supplement compared with those of established cell lines AN3CA and EMTERT (C, D).

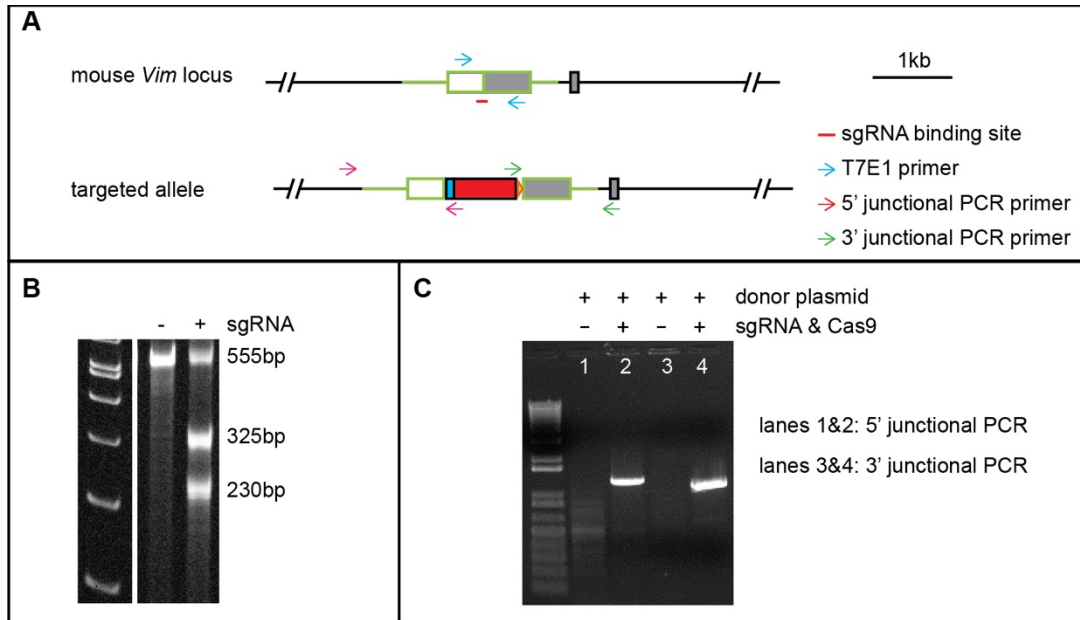

Figure S3. Validation of sgRNA and donor plasmid in vitro. (A) Schematic illustration of primer design for T7E1 assay and junctional PCR. (B) Successful NHEJ events were detected in N2A cells transfected with designed sgRNA. (C) Successful homologous recombination was achieved in N2A cells co-transfected with donor plasmid, sgRNA and Cas9.

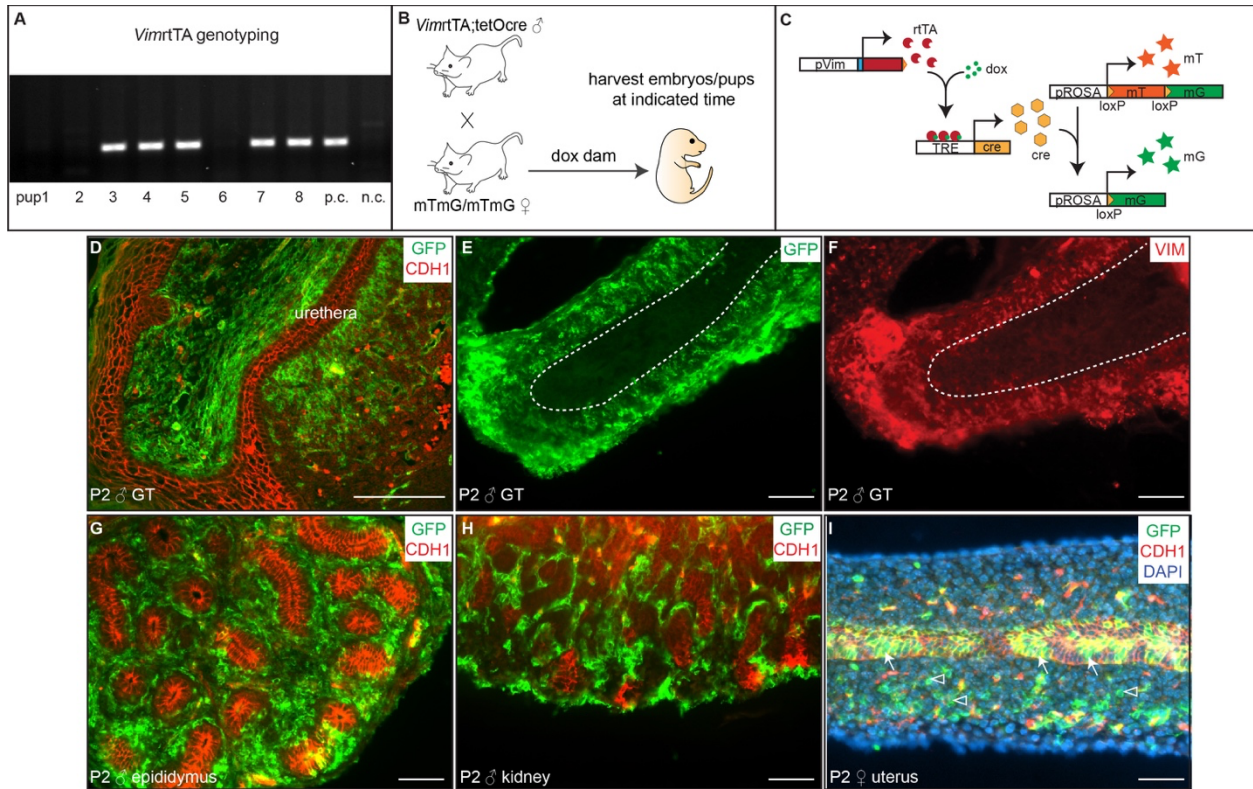

Figure S4 Generation and characterization of *Vim-rtTA* mouse. (A) PCR genotyping of littermates sired by the *Vim-rtTA* founder using primers illustrated in Fig. 3B. p.c. positive control; n.c. negative control. (B) Mating scheme to obtain embryos harboring *Vim-rtTA*, tetO-Cre and mTmG alleles. (C) A schematic of *Vim-rtTA*;tetO-Cre;mTmG system. (D-I) Immunofluorescence of GFP, CDH1 and/or VIM in various organs of postnatal day 2 mTmG<sup>*Vim*</sup> mice. Homogeneous GFP staining (green) was detected in the GT (D,E), epididymis (G) and kidney (H) mesenchyme, and was excluded from CDH1-expressing epithelia (red). In the GT, GFP expression recapitulates that of the endogenous VIM exclusively in the mesenchyme. Dotted lines outlined the urethra (E, F). (I) In the neonatal uterus, sporadic GFP<sup>+</sup> cells were detected in the stroma (open arrow heads), and GFP<sup>+</sup> cells (arrows, green) and transitional cells (yellow) were also detected in the luminal epithelium. Scale bars: 100  $\mu$ m.

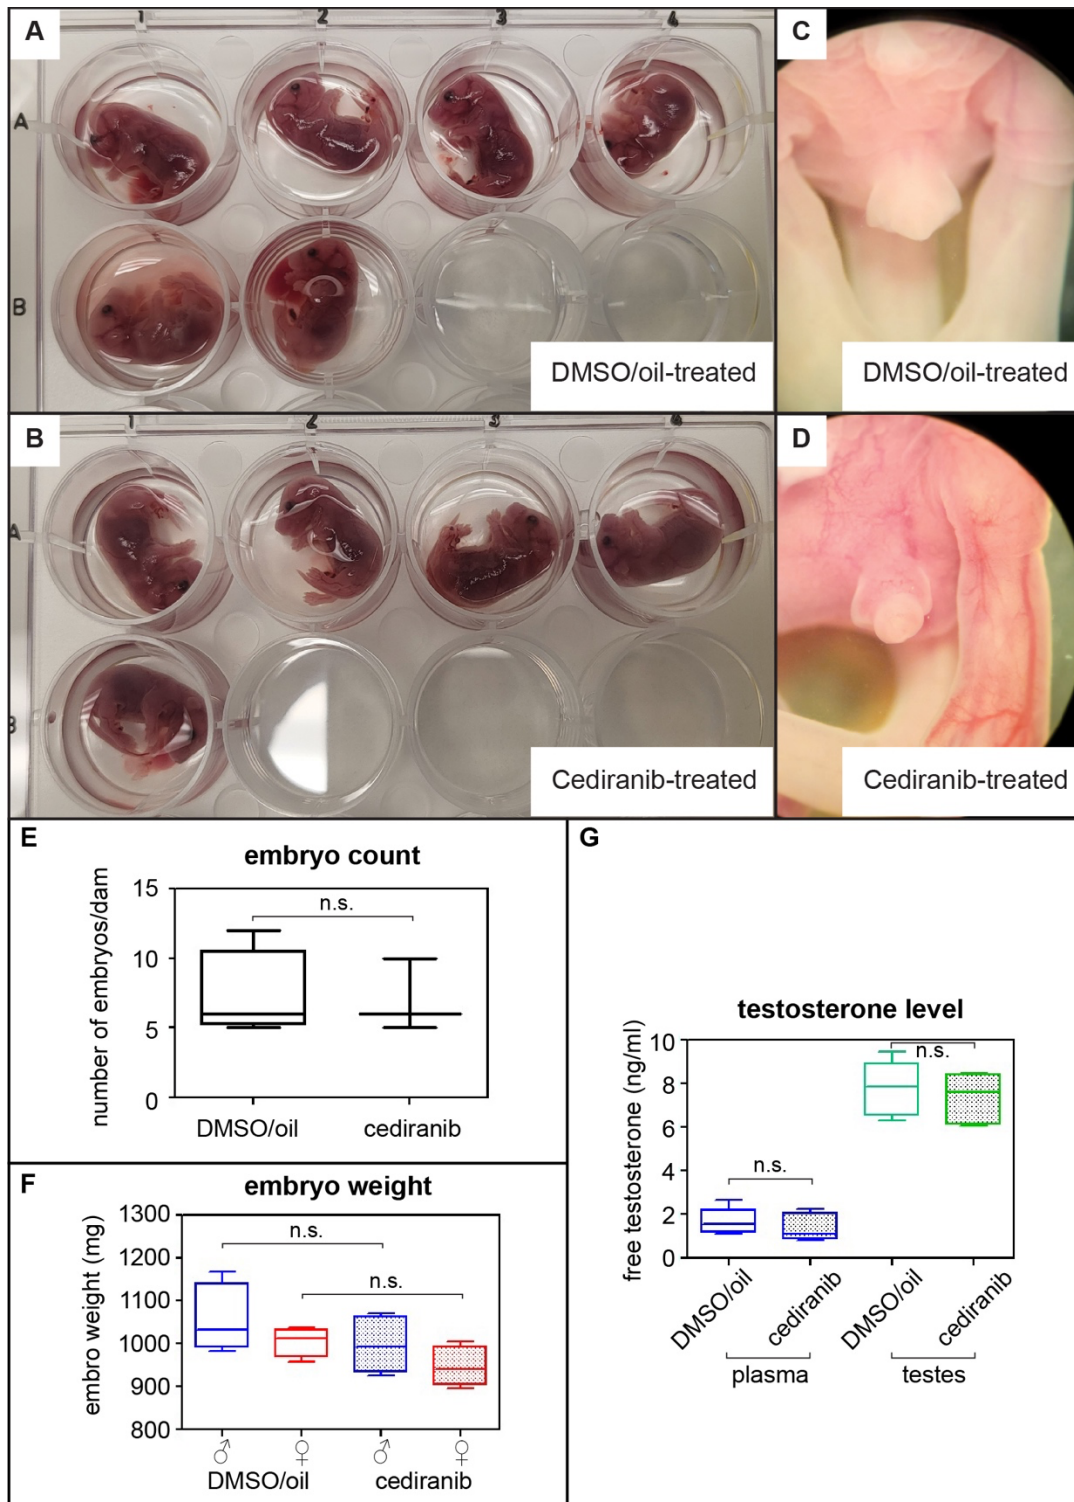

Figure S5. Evaluation of cediranib-treated embryos. (A, B) Litters of E17.5 embryos from dams that received daily oral gavage of either DMSO/oil (A) or cediranib (B) from E14.5-E16.5 showed comparable embryo number and size. (C, D) Closer view of a DMSO/oil-treated male embryo (C) and a cediranib-treated counterpart (D). Note the normal size of other tissues (legs

and tail) but marked reduced GT size in cediranib-treated embryo. (E) DMSO/oil-treated dams produced  $7.25 \pm 1.60$  pups,  $n=4$ ; while cediranib-treated dams produced  $7.00 \pm 1.53$  pups,  $n=3$ ;  $p=0.917$ . (F) Cediranib treatment did not affect embryo weight. DMSO/oil male,  $1054 \pm 41.02$  mg,  $n=14$ , vs. cediranib male,  $996.1 \pm 34.82$  mg,  $n=12$ ,  $p=0.3242$ ; DMSO/oil female,  $1004 \pm 17.17$  mg,  $n=15$ , vs. cediranib female,  $945.6 \pm 23.45$  mg,  $n=9$ ,  $p=0.0895$ . (G) Free testosterone level measured by ELISA revealed no significant difference in either embryonic plasma or whole testis lysates of treated male embryos.  $N=4$  for each of the following four groups: DMSO/oil plasma,  $1683 \pm 239.3$  pg/ml vs. cediranib plasma,  $1359 \pm 249.8$  pg/ml,  $p=0.3710$ ; DMSO/oil testes,  $7812 \pm 497.8$  pg/ml vs. cediranib testes,  $7380 \pm 433.7$  pg/ml,  $p=0.0895$ .

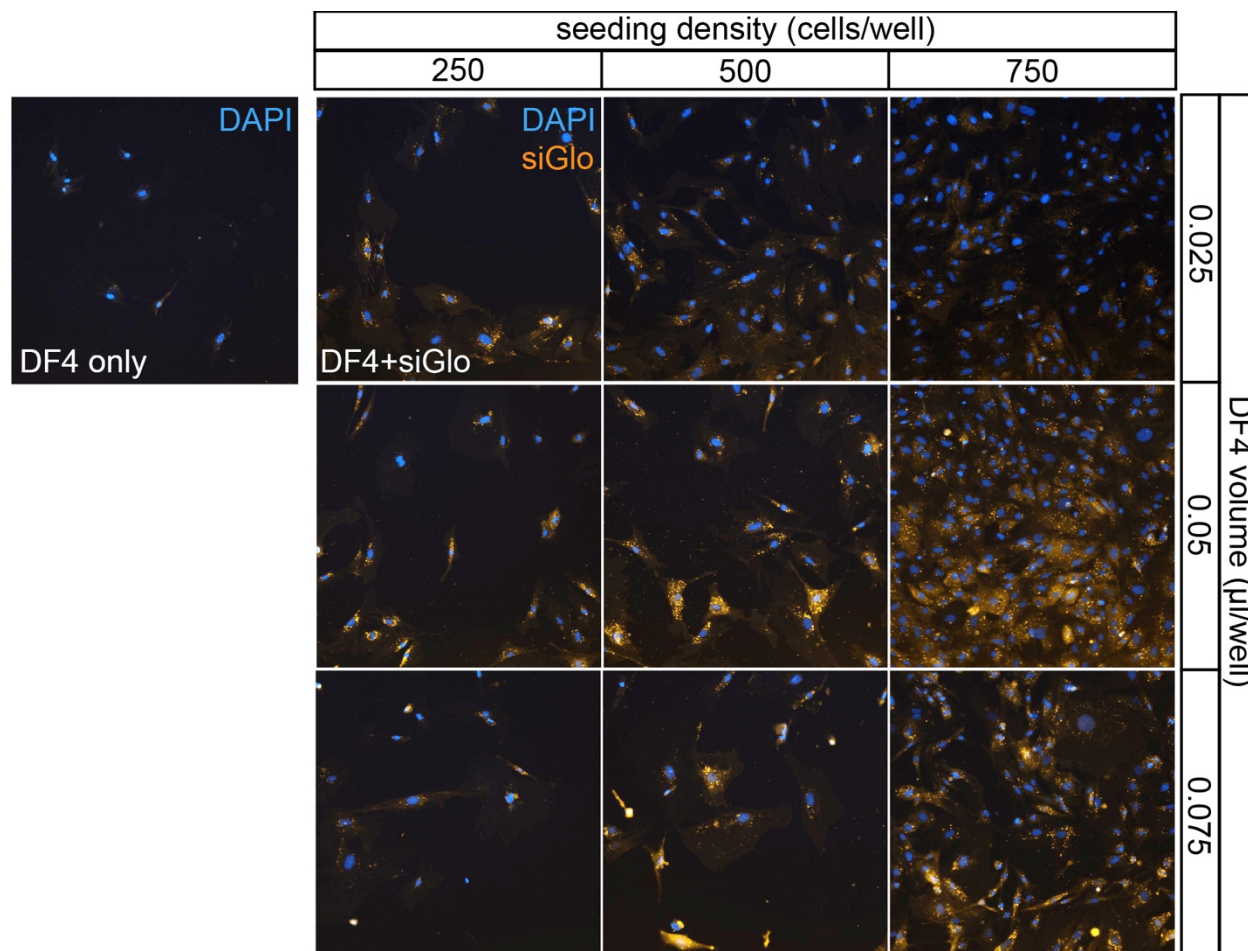

Figure S6. siRNA transfection optimization in GTme cells. GTme cells were seeded at indicated density and reverse-transfected with indicated amount of DharmaFECT4 reagent and siGlo at a final concentration of 20nM. Fluorescence microscopy was utilized to visualize incorporation of siGlo 48 hours after transfection. High transfection efficiency and minimal cytotoxicity were achieved with 0.05 µl transfection reagent/well, and seeding density of 500/well appeared to have the highest per cell intracellular dye incorporation.

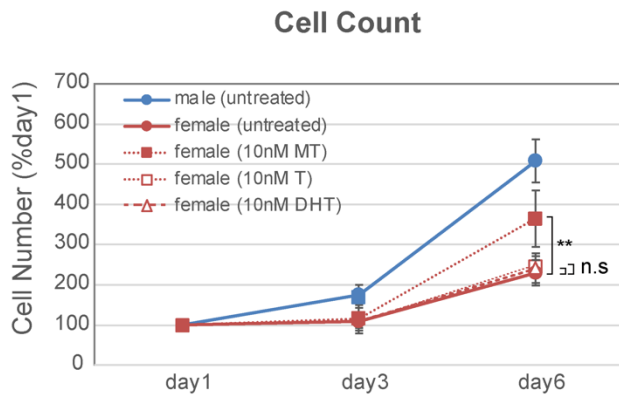

Figure S7. Treatments of testosterone (T) and dihydrotestosterone (DHT) at 10 nM did not boost female GTme proliferation as did methyltestosterone (MT). \*\*  $p < 0.01$ ; n.s., not significant.



Table S2. Top 5 signaling pathways revealed by PANTHER analysis

| <b>PANTHER pathways</b>                                 | <b>Fold Enrichment</b> | <b>raw P value</b> | <b>FDR</b> |
|---------------------------------------------------------|------------------------|--------------------|------------|
| <b>Angiogenesis</b>                                     | 51.74                  | 1.63E-12           | 2.62E-10   |
| <b>CCKR signaling map</b>                               | 49.72                  | 6.74E-11           | 5.42E-09   |
| <b>VEGF signaling pathway</b>                           | 86.4                   | 3.64E-09           | 1.96E-07   |
| <b>Integrin signaling pathway</b>                       | 36.56                  | 1.14E-08           | 4.57E-07   |
| <b>Gonadotrophin-releasing hormone receptor pathway</b> | 29.56                  | 3.89E-08           | 1.04E-06   |

Table S3. Oligos and antibody information

| <b>Oligo Information</b>           |                               |                |                 |                         |
|------------------------------------|-------------------------------|----------------|-----------------|-------------------------|
| <b>Sequence Name</b>               | <b>Sequence (5'-&gt;3')</b>   |                |                 |                         |
| Dkk2 F                             | CTGATGCGGGTCAAGGATTC          |                |                 |                         |
| Dkk2 R                             | CTCCCTCCTAGAGAGGACT           |                |                 |                         |
| Gata6 F                            | TTGCTCCGGTAACAGCAGTG          |                |                 |                         |
| Gata6 R                            | GTGGTCGCTTGTGTAGAAGGA         |                |                 |                         |
| Klf6 F                             | TTTCTGCTCGGACTCCTGAT          |                |                 |                         |
| Klf6 R                             | TTCCTGGAAGATGCTACACATTG       |                |                 |                         |
| Runx1 F                            | TTTCAAGGTACTCCTGCCTG          |                |                 |                         |
| Runx1 R                            | CAGTGAGAAGGACCAGAGAC          |                |                 |                         |
| Klf4 F                             | GTGCCCCGACTAACCCTTG           |                |                 |                         |
| Klf4 R                             | GTCGTTGAACTCCTCGGTCT          |                |                 |                         |
| Zfx4 F                             | GACTCTCCTCTATCTCAAG           |                |                 |                         |
| Zfx4 R                             | CGTTTTCAGGTTGTGATGTG          |                |                 |                         |
| Foxf1 F                            | AATGCACACATCTCCCTCC           |                |                 |                         |
| Foxf1 R                            | TTCACCTGTGATTGCTGGAG          |                |                 |                         |
| Tcf21 F                            | CTCCCTGAAAGTGGACTCAA          |                |                 |                         |
| Tcf21 R                            | CGGGCTTTTCTTAGTGGC            |                |                 |                         |
| Cdk6 F                             | GGGTACCCACAGAAACCATA          |                |                 |                         |
| Cdk6 R                             | AGGTAAGGGCCATCTGAAACT         |                |                 |                         |
| Trps1 F                            | TTGCATTCTGTAGTGGCGTT          |                |                 |                         |
| Trps1 R                            | GAGACTCCCGCATCTGAGAA          |                |                 |                         |
| Col8a1 F                           | ACTCTGTCAGACTCATTGAGG         |                |                 |                         |
| Col8a1 R                           | CAAAGGCATGTGAGGGACTTG         |                |                 |                         |
| Pid1 F                             | AGGCAAGGACTCATAGTGGC          |                |                 |                         |
| Pid1 R                             | CCAGTGTGTGTTTCTCCAG           |                |                 |                         |
| Tbx18 F                            | GTACCTGGCTTGGCAGAC            |                |                 |                         |
| Tbx18 R                            | GCATTGCTGGAACATGCG            |                |                 |                         |
| Vim 5'junctional F                 | CGAGATCACTGGGCTTGCTT          |                |                 |                         |
| Vim 5'junctional R                 | GGCTCCTCCTCCTCTGGA            |                |                 |                         |
| Vim 3'junctional F                 | TAGACATGCTCCAGCCGAT           |                |                 |                         |
| Vim 3'junctional R                 | CACACCAACCACAAATGCC           |                |                 |                         |
| Vim-rtTA F                         | TCCCTTGTGCGATTTTTCC           |                |                 |                         |
| Vim-rtTA R                         | CTCCAGCTTTTGAGCGAGTTTCCTGTGCG |                |                 |                         |
| <b>Antibody Information</b>        |                               |                |                 |                         |
| <b>Name</b>                        | <b>Vendor</b>                 | <b>Cat#</b>    | <b>dilution</b> |                         |
| E-Cadherin (24E10) Rabbit mAb (A)  | Cell Signaling                | 3199           | 1:100           |                         |
| Vimentin (D21H3) XP® Rabbit mAb (  | Cell Signaling                | 9856           | 1:100           |                         |
| Rabbit (DA1E) mAb IgG XP® Isotype  | Cell Signaling                | 2975           | 1:200           |                         |
| Rabbit (DA1E) mAb IgG XP® Isotype  | Cell Signaling                | 2985           | 1:200           |                         |
| Vimentin (D21H3) XP® Rabbit mAb    | Cell Signaling                | 5741           | 1:300           |                         |
| Mouse Anti-E-Cadherin (CDH1)       | Bdbiosciences                 | 610181         | 1:300           |                         |
| GFP Polyclonal Antibody            | ThermoFisher                  | A11122         | 1:200           |                         |
| Goat anti-Mouse IgG Secondary Ant  | ThermoFisher                  | A32723         | 1:500           |                         |
| Goat anti-Rabbit IgG Secondary Ant | ThermoFisher                  | A32740         | 1:500           |                         |
| <b>siRNA</b>                       |                               |                |                 |                         |
| gene                               | vendor                        | catalog number | Identifier      | Sequence (if available) |
| Ar                                 | Thermo Fisher                 | 4390771        | n393529         |                         |
| Gli3                               | Dharmacon                     | J-045798-05    |                 | GAACAACCCUAGUCAAGGA     |
| Mafb                               | Dharmacon                     | J-059035-09    |                 | CCUACAAGGUCAAGUGCGA     |
